# Supplementary material for: Effect of Intake of Extra Virgin Olive Oil on Mortality in a South Italian Cohort with and without NAFLD
Source: MDPI journal article supplement (doi:10.3390/nu15214593), 2023-10-29
Supplement: s1 [file s1]

## Supplementary Materials

Table S1. Daily consumption for food groups, consumption of oil, alcohol and wine by age group (years).

|                         | Age Classes (years) |                  |                  |                  |                  |                  |
|-------------------------|---------------------|------------------|------------------|------------------|------------------|------------------|
|                         | <40                 | 40-49            | 50-59            | 60-69            | 70-79            | ≥80              |
|                         | Mean (SD)           | Mean (SD)        | Mean (SD)        | Mean (SD)        | Mean (SD)        | Mean (SD)        |
| N (%)                   | 601 (21.8)          | 565 (20.5)       | 540 (19.6)       | 505 (18.3)       | 424 (15.4)       | 119 (4.3)        |
| Fruits (gr/die)         | 626.36 (527.10)     | 748.34 (608.91)  | 687.06 (562.04)  | 669.24 (530.04)  | 666.81 (560.00)  | 538.01 (408.12)  |
| Vegetables (gr/die)     | 250.47 (198.65)     | 248.63 (229.02)  | 246.05 (182.71)  | 265.84 (223.81)  | 252.23 (191.86)  | 174.10 (114.14)  |
| Legumes (gr/die)        | 34.72 (30.27)       | 31.13 (23.98)    | 33.29 (24.94)    | 35.38 (43.32)    | 33.08 (25.49)    | 28.07 (21.72)    |
| Cereals (gr/die)        | 295.61 (144.20)     | 287.92 (143.45)  | 278.72 (145.54)  | 248.41 (132.34)  | 238.06 (125.73)  | 229.46 (106.83)  |
| Fish (gr/die)           | 38.40 (29.65)       | 39.04 (30.20)    | 40.43 (29.18)    | 37.56 (38.06)    | 32.77 (28.31)    | 28.71 (24.55)    |
| EVO oil (gr/die)        | 25.95 (16.31)       | 26.76 (14.90)    | 35.70 (17.74)    | 42.32 (21.08)    | 44.43 (19.14)    | 39.16 (17.35)    |
| Total Meat (gr/die)     | 97.74 (57.98)       | 88.11 (49.22)    | 83.05 (53.69)    | 68.02 (44.94)    | 59.96 (38.63)    | 54.41 (47.49)    |
| Dairy Products (gr/die) | 229.53 (155.74)     | 217.55 (159.76)  | 189.73 (154.29)  | 183.07 (118.85)  | 204.01 (139.33)  | 245.39 (184.58)  |
| Alcohol (ml/die)        | 139.66 (205.60)     | 167.75 (245.62)  | 219.53 (274.47)  | 212.61 (273.30)  | 163.87 (217.23)  | 107.91 (117.82)  |
| Wine (ml/die)           | 94.59 (158.20)      | 130.71 (194.96)  | 174.94 (217.00)  | 176.73 (221.48)  | 145.35 (186.49)  | 103.79 (112.61)  |
| Kcalories days          | 2274.68 (718.58)    | 2266.59 (717.92) | 2255.51 (730.77) | 2143.86 (706.28) | 2083.12 (672.89) | 1920.17 (637.51) |

Fruit: Peaches, Watermelon, Apricots, Cherries, Grapes, White Melon (Spring and Summer) Apples, Pears, Citrus Fruits and Kiwis (Autumn and Winter). Vegetables: Aubergines, Courgettes, Spinach, Cabbage, Cauliflower, Turnip Greens, Cucumbers, Watermelons, Green Beans, Fava Beans with Vegetables, Carrots, Artichokes, Peppers, Fennel, Celery, Swiss Chard, Chicory, Green Salad. Salad Tomatoes. Legumes: Broad Beans, Chickpeas, Beans, Lentils and Peas. Cereals: Barley, Pasta, Rice, Pizza, Focaccia, Bread, Biscuits, Pastries. Fish: Octopus, Cuttlefish, Squid, Shrimps, Anchovies, Sardines, Mussels, Mullet, Mackerel. Total Meat: Veal, Lamb, Horse, Rabbit, Chicken, Liver, Pork, Sausage, Mortadella, Ham, Salami. Dairy products: Milk, Yoghurt, Matured Cheese, Fresh Cheese, Mozzarella, Ricotta.

Table S2. Daily consumption for food groups, consumption of oil, alcohol and wine by rMED Score.

|                         | rMED            |                 |                 |
|-------------------------|-----------------|-----------------|-----------------|
|                         | Low (0-6)       | Medium (7-10)   | High (11-18)    |
|                         | Mean (SD)       | Mean (SD)       | Mean (SD)       |
| N (%)                   | N=634           | N=1.664         | N=347           |
| Fruits (gr/die)         | 509.65 (490.49) | 708.12 (562.75) | 805.95 (555.35) |
| Vegetables (gr/die)     | 169.62 (184.32) | 256.03 (187.12) | 370.08 (254.86) |
| Legumes (gr/die)        | 22.60 (17.22)   | 34.40 (25.89)   | 48.45 (53.44)   |
| Cereals (gr/die)        | 280.78 (149.38) | 272.29 (138.52) | 247.20 (124.51) |
| Fish (gr/die)           | 31.50 (24.59)   | 37.88 (32.00)   | 46.31 (34.63)   |
| EVO oil (gr/die)        | 28.72 (18.20)   | 35.36 (19.34)   | 38.98 (18.54)   |
| Total Meat (gr/die)     | 104.30 (59.66)  | 76.61 (47.81)   | 54.04 (34.99)   |
| Dairy Products (gr/die) | 275.82 (165.71) | 200.88 (135.96) | 117.60 (111.99) |
| Alcohol (ml/die)        | 230.81 (275.60) | 170.12 (238.28) | 96.48 (138.14)  |
| Wine (ml/die)           | 168.45 (217.59) | 139.90 (195.63) | 86.89 (126.14)  |
| Kcalories days          | 17.53 (22.64)   | 14.56 (20.36)   | 9.04 (13.13)    |

Fruit: Peaches, Watermelon, Apricots, Cherries, Grapes, White Melon (Spring and Summer) Apples, Pears, Citrus Fruits and Kiwis (Autumn and Winter). Vegetables: Aubergines, Courgettes, Spinach, Cabbage, Cauliflower, Turnip Greens, Cucumbers, Watermelons, Green Beans, Fava Beans with Vegetables, Carrots, Artichokes, Peppers, Fennel, Celery, Swiss Chard, Chicory, Green Salad. Salad Tomatoes. Legumes: Broad Beans, Chickpeas, Beans, Lentils and Peas. Cereals: Barley, Pasta, Rice, Pizza, Focaccia, Bread, Biscuits, Pastries. Fish: Octopus, Cuttlefish, Squid, Shrimps, Anchovies, Sardines, Mussels, Mullet, Mackerel. Total Meat: Veal, Lamb, Horse, Rabbit, Chicken, Liver, Pork, Sausage, Mortadella, Ham, Salami. Dairy products: Milk, Yoghurt, Matured Cheese, Fresh Cheese, Mozzarella, Ricotta.
